# Supplementary figures and images for: Effect of 3-Nitroacetophenone on Corrosion Inhibition of Mild Steel in Acidic Medium
Source: Hindawi journal article supplement (doi:10.1155/2022/7276670), 2022-02-16

a)

**GRAPHICAL ABSRACT**

a)


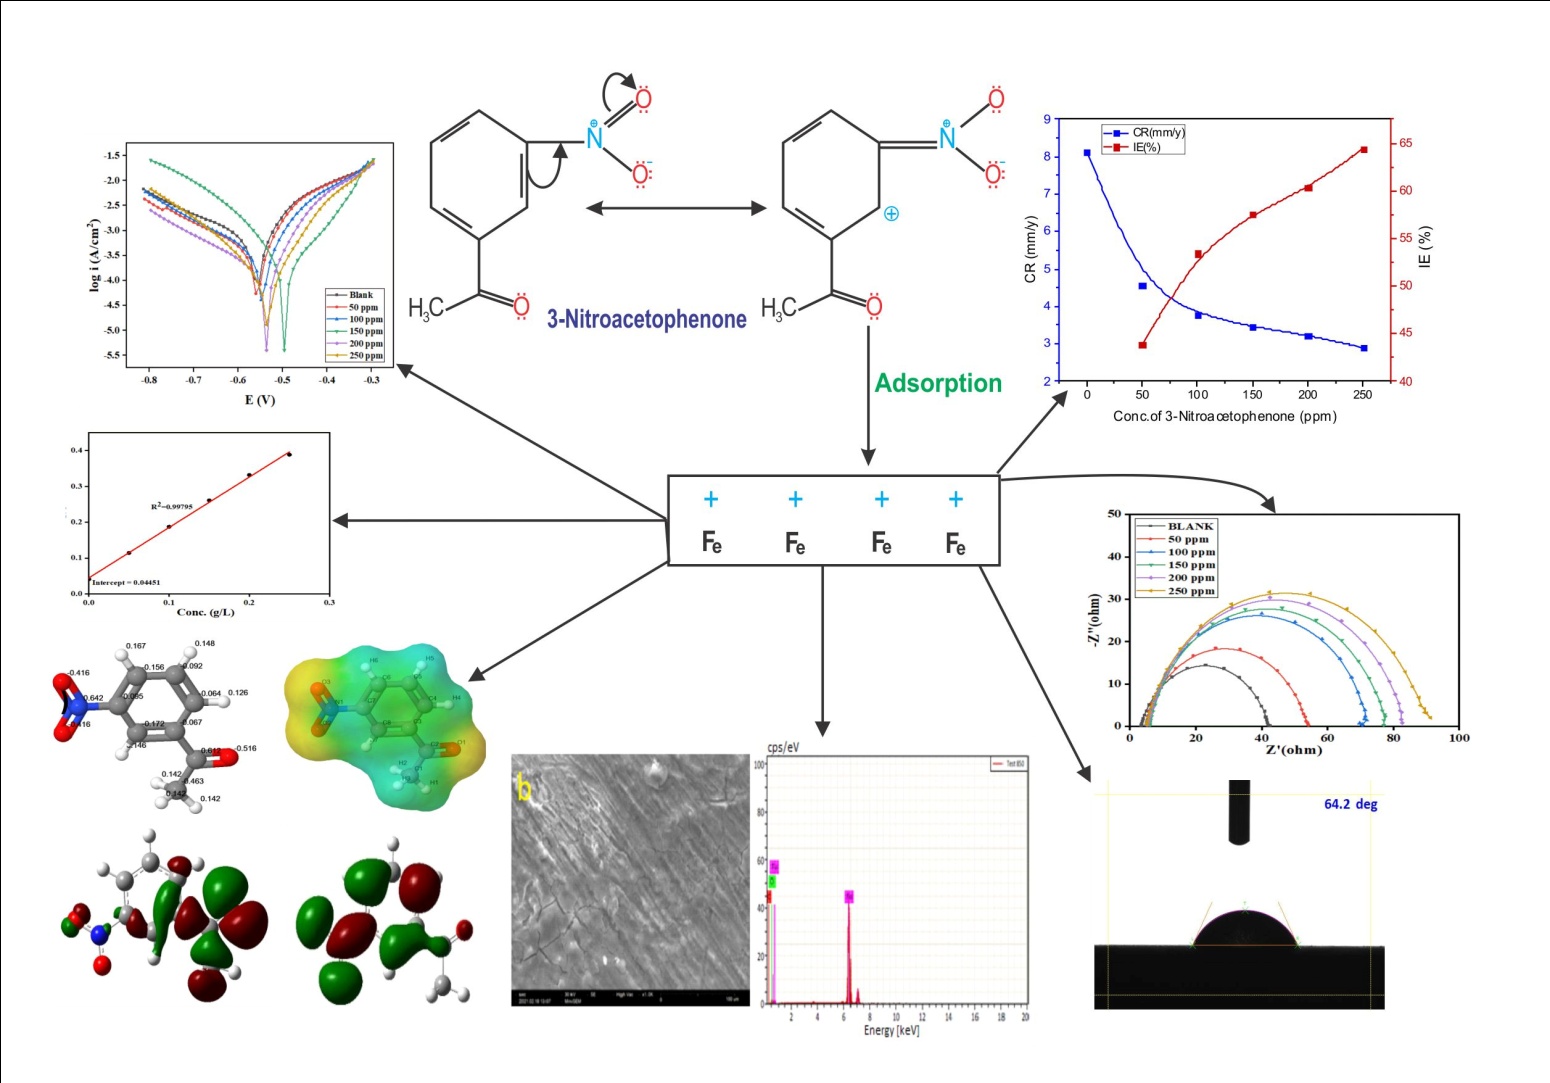

Supplement: f1 [file 7276670.f1.docx]
